# Supplementary material for: Investigation of the ionospheric absorption response to flare events during the solar cycle 23 as seen by European and South African ionosondes
Source: Copernicus journal article supplement (doi:10.5194/angeo-2019-14), 2019-01-28
Supplement: Supplementary file [file angeo-2019-14-AC2-supplement.pdf]

## Response to reviewer 2.:

### Comments on the manuscript Angeo-2019-14

‘Investigation of the ionospheric absorption response to flare events during the solar cycle 23 as seen by European and South African ionosondes’

Submitted to *Annales Geophysicae* By Veronika Barta et al.

#### General Comments:

This work shows an analysis of ionospheric parameters in mid and low-latitudes in relation to solar flares occurred in solar cycle 23. The authors investigated the radio wave absorption in D layer, in which they defined a  $df_{min}$  parameter as a good qualitative measurement to analyze this absorption.

They show an interesting analysis with interesting results. However, the authors need to organize the results and deepen in the physical discussions. Therefore, the authors need to improve significant modifications. This paper needs a major revision. Furthermore, the authors need to improve English significantly.

We would like to thank the work of Reviewer #2 and their advices. We took into account them and we refined the text of the manuscript based on their comments (as it will be listed below). We made changes and additions throughout the text, mostly in the introduction, results and discussion. A few more references have also been added based on the Reviewer's suggestion. We tried to correct the typos and mistakes and improve the English of the whole manuscript.

We hope that the revised paper will now meet with the referee's approval. The changes in the manuscript which have been performed based on the second referee's questions/comments are indicated by red.

#### Major Comments:

1. **Abstract:** The abstract is not well written. I do not understand the main objective of this study. There are some typo English mistakes as “mimumum”, “ionospheric”. The authors need to clarify better the purpose of this work.

Thank you for the comment. The first part of the abstract has been rewritten taking into account your suggestions. In the first sentence we tried to clarify better the purpose of our study. Furthermore, the typos have been corrected. The revised abstract is the following:

“We have investigated the solar flare effects on ionospheric absorption with the systematic analysis of ionograms measured at mid- and low-latitude ionosonde stations under different solar zenith angles. The lowest recorded ionosonde echo, the minimum frequency ( $f_{min}$ , a qualitative proxy for the “nondeviative” radio wave absorption occurring in the D-layer), furthermore and the  $df_{min}$  parameter (difference between the value of the  $f_{min}$  and the mean  $f_{min}$  for reference days) have been considered. Data was provided by at meridionally distributed ionosonde stations in Europe and South Africa during eight X and M class solar flares in solar cycle 23. Total and partial radio fade-out was experienced at every ionospheric stations during intense solar flares ( $> M6$ ). The duration of the total radio fade-out varied between 15 and 150 min and it was highly dependent on the solar zenith angle of the ionospheric stations. Furthermore, a solar zenith angle-dependent enhancement of the  $f_{min}$  (2-9 MHz) and  $df_{min}$  (1-8 MHz) parameters was observed at almost every stations. The  $f_{min}$  and  $df_{min}$  parameters show an increasing trend with the enhancement of the X-ray flux. Based on our results, the  $df_{min}$  parameter is a good qualitative measure for the relative variation of the “nondeviative” absorption especially in the case of the less intense solar flares which do not cause total radio fade-out in the ionosphere (class  $< M6$ ).”

2 **Introduction (pag. 2, line 25):** The solar flares cause an extra ionization in the D region, which causes an absorption of the HF waves, impairing the visualization of the E region in the data (ionograms, for example), and partially

or totally in the F region. The authors affirm that there is an absorption in the E region, also. Please, clarify this part.

During a solar flare event, a great enhancement in extreme ultraviolet (EUV) and X-ray radiation causes increases in the ionospheric electron density not only in the D but also in the E and F regions (Tsurutani et al., 2005; Nogueira et al., 2015;). The electron collision frequency is highest in the D region ( $2 \times 10^6 \text{ s}^{-1}$ ) and the HF radio waves below 10 MHz can be attenuated principally there (Zolesi and Cander, 2014). However, further studies have shown that solar flares can also cause enhancement of the neutral density and temperature of the thermosphere (Pawłowski and Ridley, 2008, 2011; Le et al., 2015). E. g. the model study by Pawłowski and Ridely (2008) has shown flare-induced density and temperature enhancements, with the effect decreasing from the 400 km (CHAMP satellite height) down to 110 km. According to the physical background of the ionospheric absorption the electrons accelerated by the electric field of the transiting radio wave suffer collisions with the atmospheric constituents because of the presence of the neutral atmosphere and induce an energy loss which results in a reduction of their reemitted signal (Sauer and Wilkinson, 2008). Consequently, the enhanced neutral density and the temperature in response to solar flare increasing also the number of collisions thus the ionospheric absorption.

In the above mentioned part of the manuscript (Introduction (pag. 2, line 25):) we wrote the following: "The loss of HF communication as a consequence of the enhanced absorption affects navigation systems, especially commercial aircraft operations. Thus the monitoring of the absorption and D-, E-region electron density variation is an important issue from a practical point of view as well." Therefore, we didn't write about the absorption occurring in the E region explicitly. We only stated that "...E-region electron density variation is an important issue..."

Nevertheless, in our study we focus on the ionospheric absorption variation in response to solar flares and not on the E region electron density variation. Thus, we changed the text of the manuscript (page 2, lines 23-25) as follows:

"The loss of HF communication as a result of the enhanced absorption affects navigation systems, especially in commercial aircraft operations. Therefore, describing, modelling and monitoring of the ionospheric absorption is an important issue from a practical point of view as well."

#### References:

- Le, H., Ren, Z., Liu, L., Chen, Y., and Zhang, H.: Global thermospheric disturbances induced by a solar flare: A modeling study, *Earth Planet. Space*, 67, 1–14, <https://doi.org/10.1186/s40623-014-0166-y>, 2015
- Nogueira, P. A. B., Souza, J. R., Abdu, M. A., Paes, R. R., Sousasantos, J., Marques, M. S., Bailey, G. J., Denardini, C. M., Batista, I. S., Takahashi, H., Cueva, R. Y. C., and Chen, S. S.: Modeling the equatorial and low-latitude ionospheric response to an intense X-class solar flare, *J. Geophys. Res.-Space*, 120, 3021–3032, <https://doi.org/10.1002/2014JA020823>, 2015
- Pawłowski, D. J. and Ridley, A. J.: Modeling the thermospheric response to solar flares, *J. Geophys. Res.*, 113, A10309, <https://doi.org/10.1029/2008JA013182>, 2008.
- Pawłowski, D. J. and Ridley, A. J.: The effects of different solar flare characteristics on the global thermosphere, *J. Atmos.-Terr. Phys.*, 73, 1840–1848, 2011.
- Sauer, H. H., and Wilkinson, D. C.: Global mapping of ionospheric HF/VHF radio wave absorption due to solar energetic protons. *Space Weather*, 6(12), 2008
- Tsurutani, B. T., Judge, D. L., Guarnieri, F. L., Gangopadhyay, P., Jones, A. R., Nuttall, J., Zambon, G. A., Didkovsky, L., Mannucci, A. J., Iijima, B., Meier, R. R., Immel, T. J., Woods, T. N., Prasad, S., Floyd, L., Huba, J., Solomon, S. C., Straus, P., and Viereck, R.: The October 28, 2003 extreme EUV solar flare and resultant extreme ionospheric effects: Comparison to other Halloween events and the Bastille Day event, *Geophys. Res. Lett.*, 32, L03S09, <https://doi.org/10.1029/2004GL021475>, 2005.
- Zolesi, B. and Cander, L.: *Ionospheric Prediction and Forecasting*, Springer Geophysics, Springer Heidelberg New York Dordrecht London, DOI 10.1007/978-3-642-38430-1., 2014

**3 Introduction (pag. 3, line 32):** It is necessary to define the  $f_{min}$  parameter;  $f_{min}$  of the F region, E region or both regions? The definition in the section "Method and data" is not enough to understand this part. The authors mention only the discussions about the  $f_{min}$  to be the minimum frequency of ionosphere, but in results (form of the data), I believe that  $f_{min}$  refers to the F region. Please, clarify this part

Thank you for the question. In our study we analyzed the "general"  $f_{min}$  parameter, the minimum frequency of the echo trace observed in the ionograms. During our analysis we examined day-time ionograms, so generally the  $f_{min}$  should be the  $f_{min}$  of the E region. However, an enhancement in the  $f_{min}$  parameter can be occurred as a consequence of the increased D region radio wave absorption (see e.g. in study of Nogueira et al., 2015). In this case the first echo can be from the F region, consequently the  $f_{min}$  is  $f_{min}$  of the F region. To clarify it, we completed this part with the following sentence:

"The  $f_{min}$  represents the minimum frequency of the echo trace observed in the ionogram and it is a rough measure of the nondeviative absorption (e.g. Davies, 1990)."

Furthermore, we present a sequence of ionograms in Fig. 1. in the revised manuscript (as it was seen in previous papers e.g. Sahai et al. 2008, Nogueira et al., 2015, Denardini et al. 2016.) providing the possibility to follow the variation of the  $f_{min}$  before and after the total radio fadeout.

**4. Results:** The results are interesting. Although this absorption is well known in the ionospheric data (Denardini et al, 2017, doi: 10.116/s40623-016-0456-7, Sahai et al., cited by authors, and other authors), the relation with the solar zenith angle is present in different form.

Thank you for the suggested papers. We read them carefully and wrote the most important findings into the introduction part. The text that has been added to the manuscript is the following:

"Solar flare effects on the equatorial and low- latitude ionosphere have been described by Sripathi et al 2013. They observed the lack of ionospheric traces in the ionograms during an X class solar flare and a strong blanketing type Es layer before and after the flare event. The total radio fade-out in the ionograms was observed simultaneously with an amplified signal amplitude in ground based VLF records. They suggested that the reason of the amplified VLF signals could be enhanced D region ionization due to solar flare which could also cause the increased absorption of HF radio waves observed in the ionograms. Partial radio fade-out and a blanketing type sporadic E layer were also detected in ionograms measured close to the equator in the Brazilian sector (Denardini et al. 2016). They determined a 42-146 % enhancement in the electron density of the E-layer after X-class solar flares with the observation of peaks in the fbEs parameter. The attenuation of radio waves (below 5–8 MHz) caused by ionospheric absorption occurred some minutes before the abnormal changes in the E region electron density and can be attributed to the additional X-ray ionization due to solar flares. Total radio blackout for about 70 min and increased values of the  $f_{min}$  parameter inferred from ionograms registered at two ionosonde stations in the equatorial region have been reported by Nogueira et al. (2015). The onset and recovery of the flare effect were observed with a consistent time difference at the two stations. Nogueira et al. (2015) stated that the reason for this time delay is the east-west separation of the observing sites."

... "Nogueira et al. (2015) observed an abrupt increase of the TEC in the sunlit hemisphere due to a flare event. The plasma density perturbation seems larger and remains for longer time in the crest region of the equatorial ionization anomaly (EIA) than at the subsolar point. However, Sripathi et al (2013) demonstrated a good correlation between the TEC enhancement caused by a solar flare and solar zenith angle. This result verifies the study of Zhang and Xiao (2005) who have shown that the  $\Delta$ TEC varies with solar zenith angle."

However, the results are arranged in numerous figures and presented with a confusing text. It would be better to present the figures together (for example Figures 1 and 2 are a single figure)

Thank you for the suggestion. We changed the structure of the results part to make it clear and more readable. In the first paragraph we determined the particular issue of research:

“In the present study we investigated the response of ionospheric absorption to solar flares with particular interest of the solar zenith angle dependence variation of it. We used ionograms measured at ionosonde stations under different solar zenith angle for the analysis. We calculated the solar zenith angles of the stations at the time of the peak of the 8 flares for the analysis. We examined three parameters that can be determined from ionograms: duration of the total radio fade-out, the value of the  $f_{min}$  parameter and the value of the  $df_{min}$  parameter. In the first step we analyzed how the duration of the fade-out during the flare event depended on the solar zenith angle (Sec. 3.1). Secondly the solar zenith angle dependence of the  $f_{min}$  and  $df_{min}$  parameters measured just after the fade-out were investigated (Sec 3.2). Then we repeated the analysis for the  $f_{min}$  and  $df_{min}$  parameters measured at a certain time after the fade-out when we again recorded them at all the stations (3.3). In the last step the impact of the intensity variation on the absorption has been considered (3.4).”

Based on your comment and question/comments of the other reviewer the Fig. 1., 2., 3. and their description can confuse the reader. Therefore, we deleted the first three Figures and their descriptions and we added a figure what shows a sequence of ionograms measured at two stations during the most intense flare events of our study (Fig. 1. in the revised manuscript). We hope that it helps to follow the behaviour of the ionosphere during this intense solar event. Furthermore, it makes clear the observation of total and partial radio fade-out and of  $f_{min}$  parameter at stations under different solar zenith angle what is the crucial part of our study.

We added the description of the Fig. 1. (in the revised manuscript) to the text as follows:

“Here we demonstrate in detail the ionospheric response to an intense X17-class eruption that occurred on 28 October 2003. The European and South African ionosonde stations were located in the sunlit hemisphere during this flare event. Fig.1 shows a sequence of ionograms recorded close to the equator (Ascension Island) and at mid-latitude (San Vito) from 09:00 UTC to 14:30 UTC on 28 October 2003. Ionograms measured every 15 min were available for the analysis, however we show the records with 30 minute time resolution to cover the whole time interval of the flare from the start until the end of decay. The upper panel of Fig. 2 shows the X-ray variation between 06 (UTC) and 18 (UTC) recorded by GOES12 satellite. In the X-ray flux we can clearly observe the flare event that started at 09:51, reached its peak at 11:10 and ended at 11:24. The most directly observed ionospheric effect due to the X-class solar flare is the total and partial fade-out of the sounding HF waves on the ionograms (Fig. 1.). The disappearance of the traces caused by the enhanced ionospheric absorption was recorded at both stations. However, the duration of the total fade-out measured at the two observation sites was different. We may notice that an increase in the  $f_{min}$  parameter was first detected in the ionogram at 10:00 (UTC) over Ascension Island, close to the dip equator ( $f_{min}$  increased to 5.4 MHz). At San Vito, located in southern Italy at mid-latitude, the effect was weaker at this time ( $f_{min} \sim 2.9$  MHz). The total attenuation of the radio waves was first recorded at Ascension Island at 11:00 (UTC). In the subsequent ionograms at 11:15 UTC (not shown here) and at 11:30 the total blackout was observed at both stations which coincided with the peak in the X-ray flux as it is shown at the upper panel in Fig. 2. The trace of the F region appears on the ionogram at San Vito at 12:00 (UTC), while the total radio fade-out remains at Ascension Island until 12:30 (UTC). With the decay in the X-ray flux the blackout became partial at both stations. The  $f_{min}$  parameter returns to its regular daily value ( $\sim 2.3$  MHz) at San Vito at 14:00. The recovery over Ascension occurs later, partial radio fade-out was still detected at 14:30. We believe that the different duration of the total radio fade-out recorded in the ionograms at the two stations can be explained by the different solar zenith angle at the two sites. Since the degree of the radio wave absorption in the ionosphere varies with the solar zenith angle, we compared ionograms measured at stations under different solar zenith angles to research into the solar zenith angle dependence of the ionospheric response.”

**5. Discussions and conclusions:** The part of the discussion is actually a conclusion. The authors did not elaborate on the physical discussions. There are numerous studies about the subject of relation between flare solar and ionospheric parameters. I suggest that the authors to discuss further the results, that are very interesting, before being published in this journal.

Thank you for your suggestion. We read the papers carefully what you previously proposed in the review and compared our results with the most important findings of them. We believe that the more detailed discussion improved the quality of the manuscript.

We must mention here that the coupled mechanisms in the magnetosphere-ionosphere-atmosphere system in response to solar flares are very complex but we focus on the changes of the ionospheric absorption and its solar zenith angle dependence in our study. Therefore, we discussed the results of previous papers only in connection with this topic.

We added the following parts to the discussion:

“Total and partial radio fade-out were experienced at every ionospheric station during and after the X class solar flares (on 2001-09-24, 2003-10-28, and on 2005-12-05) and also in the case of some M class flares (e. g. on 2006-12-06). The observed time of the absence of the echoes was between 15 min and 150 min, similar to the findings of Sahai et al. (2006) with ionosondes over the Brazilian sector on 28 October 2003. Similarly, Nogueira et al. (2015) found from a total to partial HF blackout for about 70 min in ionograms measured at the São Luís and Fortaleza equatorial stations as a result of an X2.8 solar flare. They observed a consistent time difference in the beginning and the end of the flare effect in the sequences of ionograms and they explained this phenomenon by the east-west separation of the observing sites. We investigated the beginning and the end of the total radio fade-out measured at the eastern locations as compared to the western locations. E.g. comparing the beginning and the end of the blackout at Chilton (west) with Juliusruh (east) or at Ascension Island (west) with Grahamstown (east) during the X17 flare occurring on 28 October 2003 (Fig. 2.) we cannot detect a systematic delay. Based on our results there is no detected east-west separated consistent time difference of the flare effect. Whereas, examining the duration of the total radio fade-out at the time of the same flare (28 October 2003, Fig. 2.) it seems to depend on the solar zenith angle. The smaller the zenith angle of the observation site (Grahamstown, Ascension Island) the longer the detected blackout of the HF waves. We observed a similar trend for the flares occurring on 05 December, 2006 and on 06 December, 2006 (Fig. 4.). The total radio fade-out during the time of intense solar flares ( $M > 5$ ) could be understood due to absorption of radio signals by enhanced D region ionization. Previous studies reported that enhanced ionization of the D region can lower the reflection height of the VLF radio waveguide and amplify the amplitude of the propagating signals (Thomson and Clilverd, 2001; Thomson et al., 2004; Kolarski and Grubor, 2014). Sripathi et al 2013 observed lack of ionospheric traces in the ionograms simultaneously with an amplified amplitude signal of ground based VLF records during an X class solar flare. Their results suggest there could be enhanced D region ionization due to solar flare which also caused absorption of HF radio waves in the ionograms.”

...

“Contradictory results have been reported in the literature about the solar zenith angle dependence of the ionospheric response to solar flares. Our results are in agreement with D-RAP model (<https://www.swpc.noaa.gov/products/d-region-absorption-predictions-d-rap/>) on the dependence of solar zenith angle. This model was developed based on the theoretical descriptions of the ionospheric absorption by Davies (1990) and Sauer and Wilkinson (2008). According to the model the Highest Affected Frequency (HAF) is largest at the sub-solar point and it decreases with increasing solar zenith angle. Moreover, Zhang and Xiao (2005) and Spirathi et al. (2013) have demonstrated a good correlation between the TEC enhancement caused by solar flares and the solar zenith angle, too. However, Li et al. (2018) concluded that there is no strong relationship between the Ne variation of the D region and the solar zenith angle. Furthermore, Nogueira et al. (2015) demonstrated an abrupt increase of the TEC. The observed anomaly seemed larger and remained for a longer time in the crest region of the equatorial ionization anomaly (EIA) than at the subsolar point. We also observed the largest and the longest-lasting perturbation of the ionospheric absorption in the equatorial region (at Ascension Island) in most of the cases. However, our results suggest that the solar zenith angle of the observation site plays an important role. For instance, at the peak time of the X9 flare (05 December 2006) the zenith angle of the ionosonde station at Ascension Island (geomagnetic latitude:  $-2.31^\circ$ ) was  $36.14^\circ$  and the duration of the fade-out was 60 min, smaller than measured at Grahamstown (geomagnetic latitude:  $-34.01^\circ$ , see Table 3.). Even a larger difference was observed at the two stations during the M5-class flare at 09:27 on 27 October 2003. The solar zenith angle of Ascension Island was  $47.96^\circ$  at the peak time and there was no detected total radio fade-out. While at Grahamstown with a smaller solar zenith angle ( $21.77^\circ$ ) the duration of

the total attenuation of HF waves was 150 min (Table 3.). Therefore, our observations confirm the results of Zhang and Xiao (2005), Spirathi et al. (2013) and the D-RAP model that the solar zenith angle plays an important role in the ionospheric response to solar flares.”

**Minor Comments:**

- English needs to improve in all manuscript: grammar, typo mistakes, absence of commas, and verbal agreement.

We tried to correct the typos and mistakes and improve the English of the whole manuscript.

- Legend of the figures (1 up to 5) are very difficult to see.

Thank you. The labels and titles of the figures (Fig. 1-3 in the revised manuscript) have been increased in order to be more readable.
